# Supplementary material
Source: PubMed Central journal article supplement (PMC9887493)
Supplement: mmc1.pdf [file mmc1.pdf]

Supplemental materials

**Table S1. Timing of mass vaccination and sampling points**

| Sampling point | 0                         | Mass vaccination                   | 1                                                           | 2                                                           | 3                                                            | 4                                                            | Mass vaccination                   | 5                                                          | 6                                                          | 7                                                           |
|----------------|---------------------------|------------------------------------|-------------------------------------------------------------|-------------------------------------------------------------|--------------------------------------------------------------|--------------------------------------------------------------|------------------------------------|------------------------------------------------------------|------------------------------------------------------------|-------------------------------------------------------------|
| Timing         | Before vaccination        | BNT162b2 monovalent                | 3 weeks after the second dose;<br>3 wks aft 2 <sup>nd</sup> | 8 weeks after the second dose;<br>8 wks aft 2 <sup>nd</sup> | 3 months after the second dose;<br>3 mos aft 2 <sup>nd</sup> | 6 months after the second dose;<br>6 mos aft 2 <sup>nd</sup> | BNT162b2 monovalent                | 3 weeks after the third dose;<br>3 wks aft 3 <sup>rd</sup> | 8 weeks after the third dose;<br>8 wks aft 3 <sup>rd</sup> | 6 months after the third dose;<br>6 mos aft 3 <sup>rd</sup> |
| Time period    | 16/02/2021<br>-09/03/2021 | 1 <sup>st</sup> dose<br>05/03/2021 | 15/04/2021<br>-28/04/2021                                   | 20/05/2021<br>-02/06/2021                                   | 28/06/2021<br>-09/07/2021                                    | 28/09/2021<br>-08/10/2021                                    | 3 <sup>rd</sup> dose<br>20/12/2021 | 11/01/2022<br>-21/01/2022                                  | 14/02/2022<br>-25/02/2022                                  | 28/09/2021<br>-08/10/2021                                   |
| RBD-IgG        | ✓                         | -12/03/2021<br>&                   | ✓                                                           | ✓                                                           | ✓                                                            | ✓                                                            | -28/12/2021                        | ✓                                                          | ✓                                                          | ✓                                                           |
| NA-Omicron     |                           | 2 <sup>nd</sup> dose<br>26/03/2021 |                                                             |                                                             |                                                              |                                                              |                                    | ✓                                                          |                                                            |                                                             |
| QFN            | ✓                         | -02/04/2021                        |                                                             | ✓                                                           |                                                              | ✓                                                            |                                    |                                                            | ✓                                                          | ✓                                                           |

Abbreviations:

RBD-IgG, anti-receptor binding domain IgG titer measured using SARS-CoV-2 IgG II Quant reagents and Alinity Analyzer (Abbott Laboratories, Abbott Park, IL, USA); NA-Omicron, Neutralizing antibody titer for Omicron variants measured using clinically isolated Omicron (B.1.1.529) variant strain; QFN, T-cell immunity assessed by QuantiFERON SARS-CoV-2 tests (Qiagen, Hilden, Germany)

**Fig S1. Flow chart of the participants included in the study**

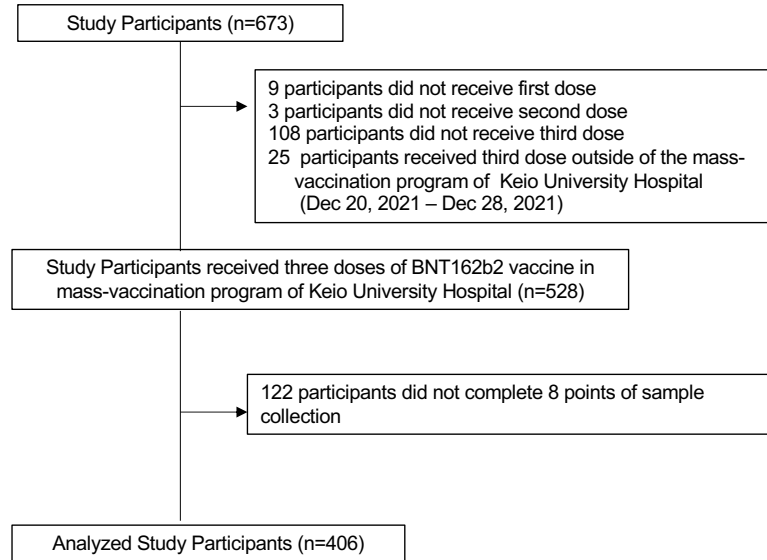

**Table S2. Demographics of the analyzed participants.**

|                                                                | N=406 |               |
|----------------------------------------------------------------|-------|---------------|
| Age                                                            |       |               |
| Median age, years (IQR)                                        | 47    | (39 – 54)     |
| ≥50 years-old (%)                                              | 167   | (41.1)        |
| <50 years-old (%)                                              | 239   | (58.9)        |
| Sex                                                            |       |               |
| Male (%)                                                       | 104   | (25.6)        |
| Female (%)                                                     | 302   | (74.4)        |
| Median BMI, kg/m <sup>2</sup> (IQR)                            | 21.5  | (19.7 – 23.9) |
| History before vaccination                                     |       |               |
| Immunosuppressant use (%)                                      | 14    | (3.4)         |
| Malignancy (%)                                                 | 7     | (1.7)         |
| Diabetes (%)                                                   | 3     | (0.7)         |
| COVID-19 (%)                                                   | 5     | (1.2)         |
| Geometric mean RBD-IgG titer before vaccination, AU/mL (95%CI) | 3.08  | (2.38 – 3.80) |
| Geometric mean of QFN results                                  |       |               |
| IFN for Ag1, IU/mL (95%CI)                                     | 0.02  | (0.02 – 0.03) |
| IFN for Ag2, IU/mL (95%CI)                                     | 0.02  | (0.02 – 0.02) |

Abbreviations: IQR, interquartile range; BMI, body mass index; RBD-IgG, Anti-receptor binding domain IgG; QFN, QuantiFERON; IFN, interferon gamma; Ag, antigen.

**Table S3 Participants with laboratory confirmed breakthrough infections.**

| Age  | Sex | Severity     | RBD-IgG titer, AU/mL (The time periods of breakthrough infection episodes are demonstrated as "Star") |              |              |              |              |              |              |          |
|------|-----|--------------|-------------------------------------------------------------------------------------------------------|--------------|--------------|--------------|--------------|--------------|--------------|----------|
|      |     |              | 3wks aft 2nd                                                                                          | 8wks aft 2nd | 3mos aft 2nd | 6mos aft 2nd | 3wks aft 3rd | 8wks aft 3rd | 6mos aft 3rd |          |
| 60's | F   | Asymptomatic | 13,457.0                                                                                              | 4,860.6      | 2,426.5      | 844.7        | 15,840.3     | 11,095.8     | ★            | 45,863.7 |
| 50's | F   | Mild         | 15,838.9                                                                                              | 6,091.3      | 3,280.5      | 2,282.5      | 10,916.9     | 6,962.3      | ★            | 85,181.3 |
| 50's | F   | Mild         | 13,720.5                                                                                              | 5,135.1      | 2,536.1      | 860.8        | 17,842.9     | ★            | 136,802.0    | 72,933.0 |
| 30's | M   | Mild         | 10,630.2                                                                                              | 4,179.5      | 1,918.9      | 737.5        | 15,661.5     | 7,974.8      | ★            | 44,178.8 |
| 30's | F   | Mild         | 39,878.3                                                                                              | 16,044.1     | 7,565.1      | 2,264.9      | 29,523.7     | 19,863.9     | ★            | 91,193.3 |
| 30's | F   | Mild         | 6,603.2                                                                                               | 2,367.1      | 1,008.3      | 574.2        | 15,758.2     | 8,184.5      | ★            | 30,962.8 |
| 40's | F   | Mild         | 18,811.6                                                                                              | 8,738.3      | 5,614.8      | 2,339.3      | 29,329.0     | 17,878.1     | ★            | 52,224.9 |
| 40's | F   | Asymptomatic | 12,826.5                                                                                              | 4,604.3      | 1,487.1      | 253.7        | 24,832.2     | 16,709.7     | ★            | 9,279.5  |
| 30's | M   | Mild         | 6,960.0                                                                                               | 3,192.5      | 1,727.6      | 709.9        | 8,692.9      | 8,000.8      | ★            | 70,420.8 |
| 40's | F   | Mild         | 13,912.9                                                                                              | 4,919.1      | 2,414.8      | 900.3        | 25,224.9     | ★            | 65,290.4     | 37,240.3 |
| 40's | F   | Mild         | 35,454.8                                                                                              | 15,811.5     | 7,118.4      | 1,335.0      | 36,027.6     | 19,181.4     | ★            | 38,348.4 |
| 40's | F   | Mild         | 7,169.9                                                                                               | 2,924.2      | 1,522.3      | 518.7        | 7,254.3      | 4,248.6      | ★            | 11,905.6 |
| 40's | F   | Mild         | 26,145.8                                                                                              | 8,917.6      | 3,983.5      | 794.0        | 27,534.3     | 13,588.2     | ★            | 17,304.0 |
| 40's | M   | Mild         | 3,827.1                                                                                               | 1,514.4      | 766.2        | 277.0        | 7,289.3      | ★*           | 5,985.2      | 21,684.7 |
| 50's | F   | Asymptomatic | 14,127.6                                                                                              | 5,697.4      | 2,287.1      | 657.6        | 19,111.7     | ★            | 12,207.4     | 3,652.7  |
| 40's | F   | Asymptomatic | 7,947.0                                                                                               | 2,555.9      | 1,346.9      | 359.8        | 12,850.3     | 10,307.8     | ★            | 35,359.3 |
| 20's | F   | Mild         | 29,500.0                                                                                              | 8,766.7      | 4,412.9      | 1,191.3      | 25,160.6     | 15,500.4     | ★            | 53,450.4 |
| 40's | F   | Mild         | 15,777.1                                                                                              | 6,725.2      | 3,116.1      | 1,011.6      | 15,890.5     | 10,963.3     | ★            | 36,764.8 |
| 20's | F   | Mild         | 21,306.7                                                                                              | 9,084.4      | 4,225.0      | 1,622.2      | 17,422.0     | 10,237.1     | ★            | 30,779.9 |
| 50's | F   | Mild         | 29,254.3                                                                                              | 13,839.3     | 10,055.7     | 3,920.2      | 35,839.9     | 18,557.3     | ★            | 29,194.5 |
| 40's | F   | Mild         | 20,958.5                                                                                              | 8,789.1      | 4,509.3      | 1,073.3      | 31,373.8     | 14,440.3     | ★            | 74,296.5 |
| 40's | F   | Mild         | 17,364.3                                                                                              | 6,953.2      | 3,924.4      | 666.8        | 12,897.0     | 9,346.6      | ★            | 73,406.2 |
| 50's | F   | Mild         | 9,454.2                                                                                               | 6,310.2      | 4,621.6      | ★            | 38,653.5     | 27,120.6     | 24,100.7     | 14,016.7 |
| 30's | F   | Mild         | 50,183.2                                                                                              | 17,769.2     | 7,915.8      | 1,997.1      | 32,135.6     | 22,632.1     | ★            | 30,907.3 |
| 60's | M   | Mild         | 24,801.5                                                                                              | 11,430.1     | 6,550.6      | 1,809.6      | 16,760.7     | 15,984.8     | ★            | 66,078.6 |
| 30's | F   | Mild         | 9,408.9                                                                                               | 3,956.5      | 1,808.3      | 780.0        | 12,850.0     | 9,386.4      | ★            | 37,430.8 |
| 30's | M   | Mild         | 9,052.5                                                                                               | 3,108.1      | 1,481.2      | ★            | 530.1        | 20,863.3     | 15,366.1     | 5,388.3  |
| 30's | F   | Mild         | 4,223.3                                                                                               | 1,533.9      | 662.6        | 208.1        | 6,554.8      | 4,070.4      | ★            | 27,965.5 |

Severity is defined according to the COVID-19 practice manual by Ministry of Health, Labour and Welfare, Japan. Asymptomatic cases were defined as patients who had positive COVID-19 diagnostic test (antigen test or molecular test) results without COVID-19 symptoms. Mild cases were defined as symptomatic COVID-19 patients without any signs of pneumonia or oxygen demands.

\*The onset of breakthrough infection was at the same day the samples of 8wks aft 3<sup>rd</sup> were collected.

**Fig S2. Comparison of RBD-IgG and QFN between the participants with laboratory confirmed breakthrough infections and those without infections.**

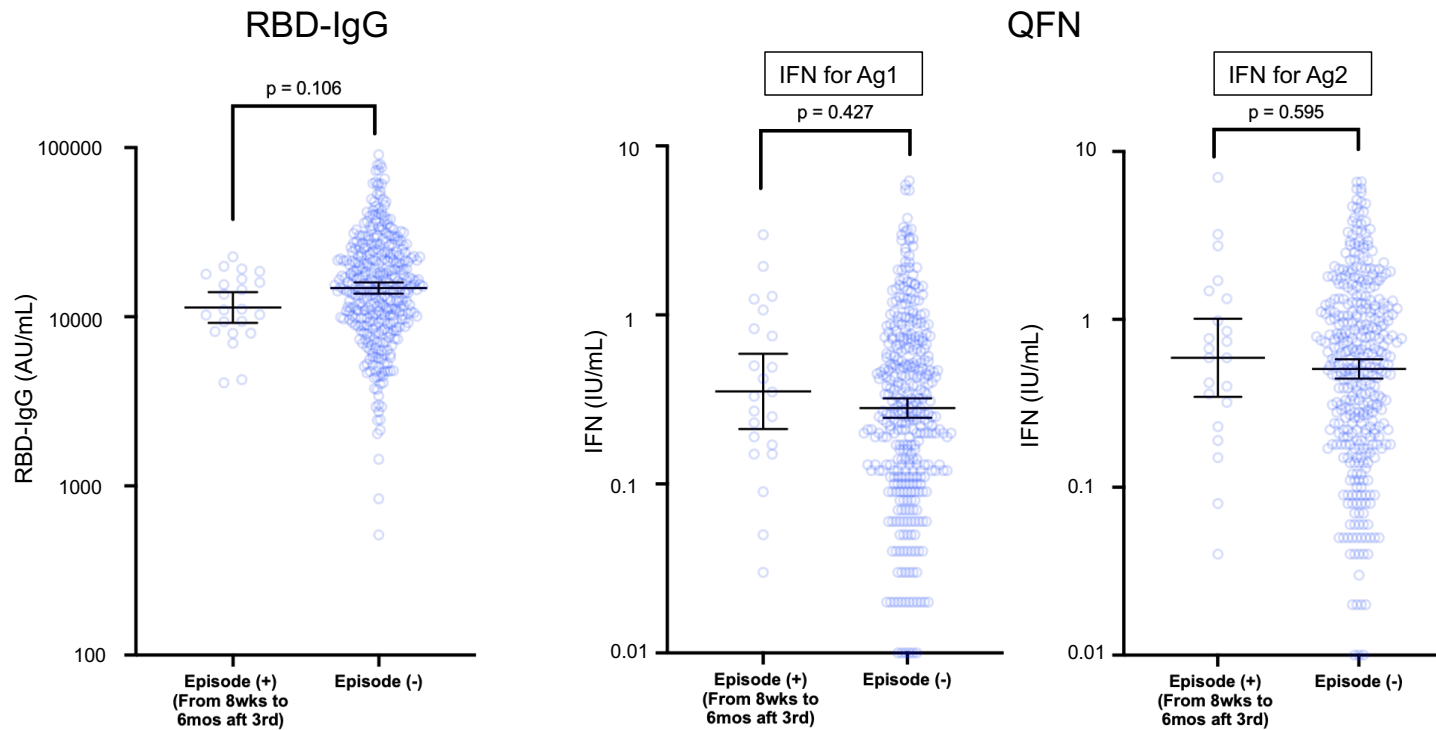

RBD-IgG antibody titer and QFN results at 8 weeks after 3<sup>rd</sup> dose administration were compared between the participants with or without breakthrough. The participants who had an episode of breakthrough infection from 8 weeks to 6 months after 3<sup>rd</sup> dose administration were shown as Episode (+) (N = 22), while those who had no episodes of breakthrough infections during the study period were as Episode (-) (N = 378). Geometric means and 95% confidence intervals were demonstrated. A parametric test of the logarithm was used for comparison. Abbreviations: QFN, QuantiFERON; RBD-IgG, Anti-receptor binding domain IgG; IFN, interferon gamma; Ag, antigen.

**Table S4 Participants who received the fourth dose of COVID-19 vaccine.**

| Age* | Sex | The fourth dose of COVID-19 vaccine |                    | 8wks aft 3 <sup>rd</sup>  |                          |                         |                         | 6mos aft 3 <sup>rd</sup>  |                          |                         |                         |
|------|-----|-------------------------------------|--------------------|---------------------------|--------------------------|-------------------------|-------------------------|---------------------------|--------------------------|-------------------------|-------------------------|
|      |     | Date of administration              | Brand <sup>†</sup> | Date of sample collection | Antibody RBD-IgG (AU/mL) | QFN IFN for Ag1 (IU/mL) | QFN IFN for Ag2 (IU/mL) | Date of sample collection | Antibody RBD-IgG (AU/mL) | QFN IFN for Ag1 (IU/mL) | QFN IFN for Ag2 (IU/mL) |
| 60's | F   | 22-Jun                              | Comirnaty          | 16-Feb                    | 512.7                    | 0.00                    | 0.00                    | 6-Jul                     | 5,204.4                  | 0.03                    | 0.02                    |
| 60's | F   | 23-Jun                              | Spikevax           | 15-Feb                    | 7,038.1                  | 0.10                    | 0.09                    | 7-Jul                     | 14,431.8                 | 0.07                    | 0.17                    |
| 60's | F   | 23-Jun                              | Spikevax           | 14-Feb                    | 11,095.8                 | 0.49                    | 0.32                    | 1-Jul                     | 45,863.7                 | 0.73                    | 0.68                    |
| 60's | F   | 24-Jun                              | Spikevax           | 17-Feb                    | 14,202.3                 | 0.89                    | 0.93                    | 7-Jul                     | 17,117.4                 | 0.19                    | 0.30                    |
| 60's | M   | 24-Jun                              | Spikevax           | 18-Feb                    | 31,439.4                 | 0.14                    | 0.51                    | 4-Jul                     | 37,989.0                 | 1.08                    | 1.82                    |
| 60's | M   | 11-Jun                              | Comirnaty          | 15-Feb                    | 11,898.5                 | 0.01                    | 0.01                    | 1-Jul                     | 146,518.7                | 0.01                    | 0.01                    |
| 60's | M   | 23-Jun                              | Spikevax           | 18-Feb                    | 24,102.1                 | 0.74                    | 1.05                    | 1-Jul                     | 39,255.2                 | 1.53                    | 1.24                    |
| 60's | F   | 23-Jun                              | Spikevax           | 22-Feb                    | 6,967.3                  | 0.01                    | 0.02                    | 6-Jul                     | 20,134.3                 | 0.09                    | 0.13                    |
| 60's | M   | 18-Jun                              | Spikevax           | 15-Feb                    | 9,380.5                  | 0.20                    | 0.18                    | 1-Jul                     | 31,555.4                 | 0.73                    | 0.76                    |
| 60's | M   | 24-Jun                              | Spikevax           | 22-Feb                    | 33,983.1                 | 0.66                    | 1.07                    | 8-Jul                     | 44,413.4                 | 1.31                    | 1.64                    |
| 60's | F   | 8-Jun                               | Comirnaty          | 15-Feb                    | 35,141.2                 | 0.48                    | 0.46                    | 28-Jun                    | 56,935.4                 | 0.35                    | 0.40                    |
| 60's | F   | 23-Jun                              | Spikevax           | 16-Feb                    | 10,269.2                 | 0.02                    | 0.06                    | 30-Jun                    | 21,639.9                 | 0.38                    | 0.51                    |
| 60's | F   | 24-Jun                              | Spikevax           | 24-Feb                    | 2,939.2                  | 0.11                    | 0.15                    | 4-Jul                     | 10,248.9                 | 0.17                    | 0.17                    |
| 60's | F   | 23-Jun                              | Spikevax           | 22-Feb                    | 21,579.5                 | 0.06                    | 0.05                    | 1-Jul                     | 35,701.6                 | 0.10                    | 0.08                    |
| 30's | F   | 11-Jun                              | Comirnaty          | 24-Feb                    | 840.8                    | 0.20                    | 0.27                    | 1-Jul                     | 4,410.7                  | 1.25                    | 2.07                    |
| 60's | F   | 18-Jun                              | Comirnaty          | 14-Feb                    | 23,902.6                 | 0.26                    | 0.83                    | 29-Jun                    | 29,680.0                 | 1.13                    | 1.03                    |
| 60's | F   | 24-Jun                              | Spikevax           | 18-Feb                    | 5,757.9                  | 0.07                    | 0.09                    | 8-Jul                     | 10,999.3                 | 0.31                    | 0.43                    |
| 50's | M   | 24-Jun                              | Spikevax           | 21-Feb                    | 10,385.6                 | 0.17                    | 0.54                    | 30-Jun                    | 18,481.0                 | 0.58                    | 0.38                    |
| 60's | F   | 23-Jun                              | Spikevax           | 16-Feb                    | 30,273.3                 | 0.70                    | 0.73                    | 30-Jun                    | 37,424.1                 | 2.60                    | 1.80                    |

\*In Japan, 4<sup>th</sup> dose of the COVID-19 vaccine were recommended for all people aged over 60 years-old and adult people with underlying illness from May 25<sup>th</sup>, 2022 to July 23<sup>th</sup>, 2022. †Comirnaty vaccine was BNT162b2 monovalent vaccine (Pfizer, NY, USA) and Spikevax vaccine was mRNA-1273 monovalent vaccine (Moderna, MA, USA). Abbreviations: QFN, QuantiFERON; RBD-IgG, Anti-receptor binding domain IgG; IFN, interferon gamma; Ag, antigen.

**Fig S3. Relationship between RBD-IgG and NA-Omicron.**

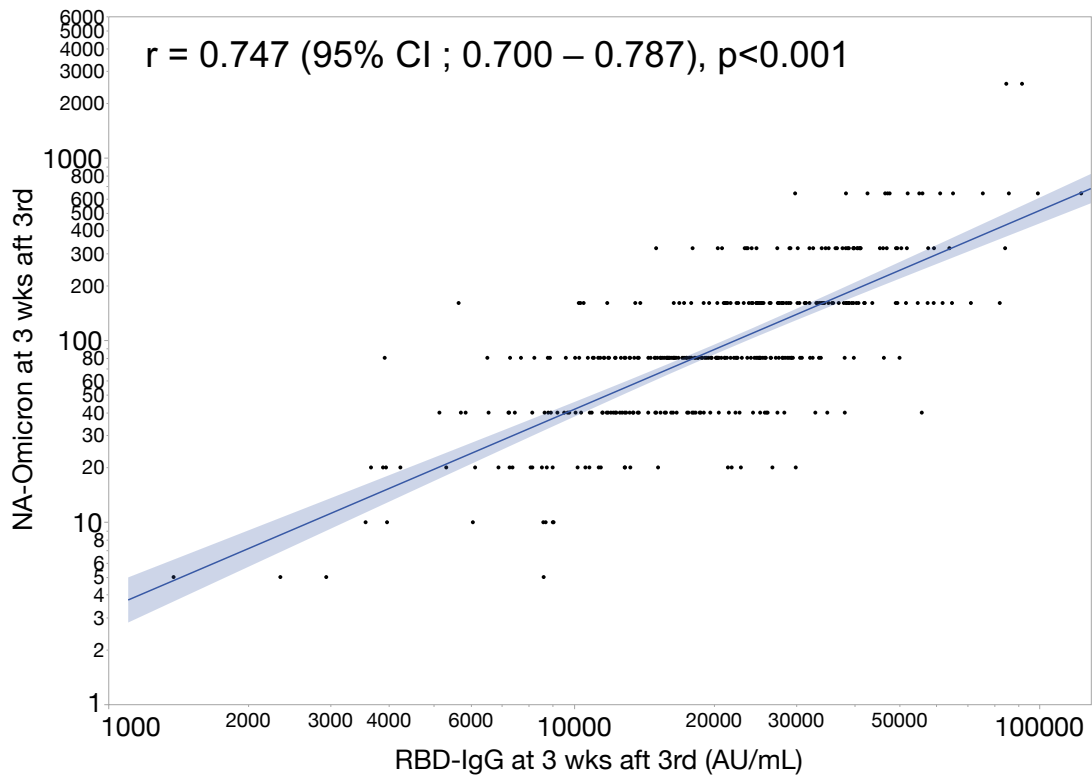

\*RBD-IgG: anti-receptor binding domain IgG titer measured using SARS-CoV-2 IgG II Quant reagents and Alinity Analyzer (Abbott Laboratories, Abbott Park, IL, USA). NA-Omicron: Neutralizing antibody titer for Omicron variants measured using clinically isolated Omicron (B.1.1.529) variant strain.

**Fig S4. Mixed effect model analysis results of RBD-IgG and QFN**

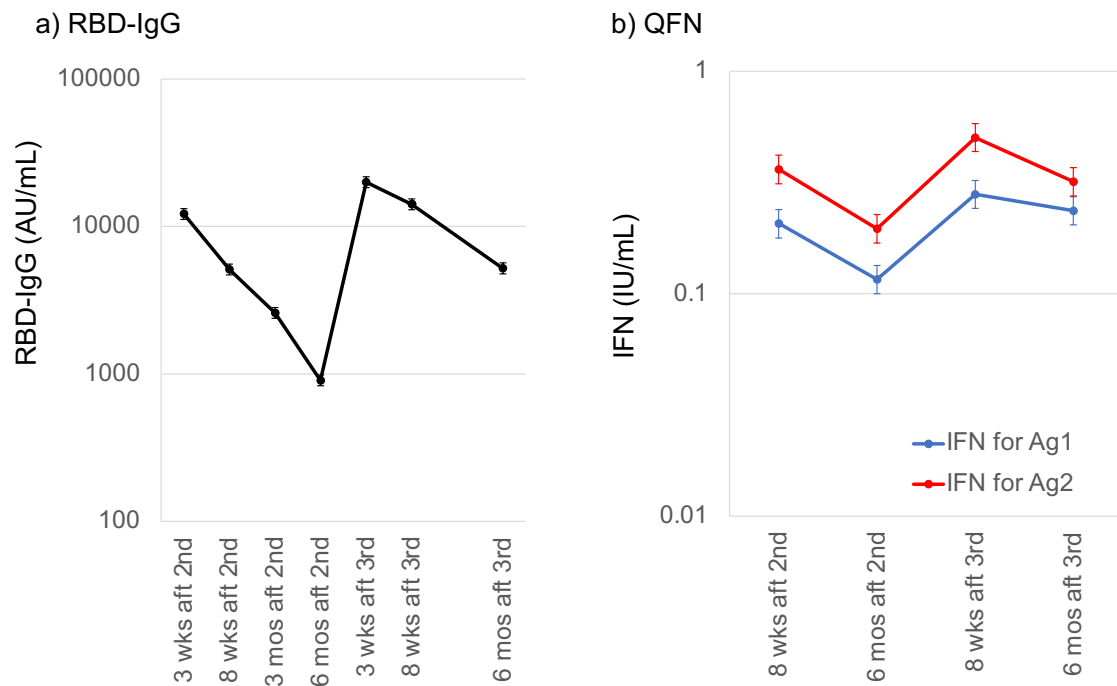

a) Mixed effects model analysis including logarithms of RBD-IgG titers at all seven blood collection points after vaccination, age groups and sex were performed. The plots demonstrated adjusted means and error bars demonstrated 95% confidence intervals. b) Mixed effects model analysis including logarithms of IFN for Ag1 or Ag2 titers at all four blood collection points after vaccination, age groups and sex were performed. The plots demonstrated adjusted means and error bars demonstrated 95% confidence intervals.

\*Abbreviations: RBD-IgG, anti-receptor binding domain IgG titer; QFN, QuantiFERON SARS-CoV-2 tests (Qiagen, Hilden, Germany); IFN for Ag1, the interferon gamma levels for antigen 1; IFN for Ag2, the interferon gamma levels for antigen 2.
